# Supplementary material
Source: MDPI journal article supplement (https://www.mdpi.com/2073-8994/15/2/498)
Supplement: s1 [file s1]

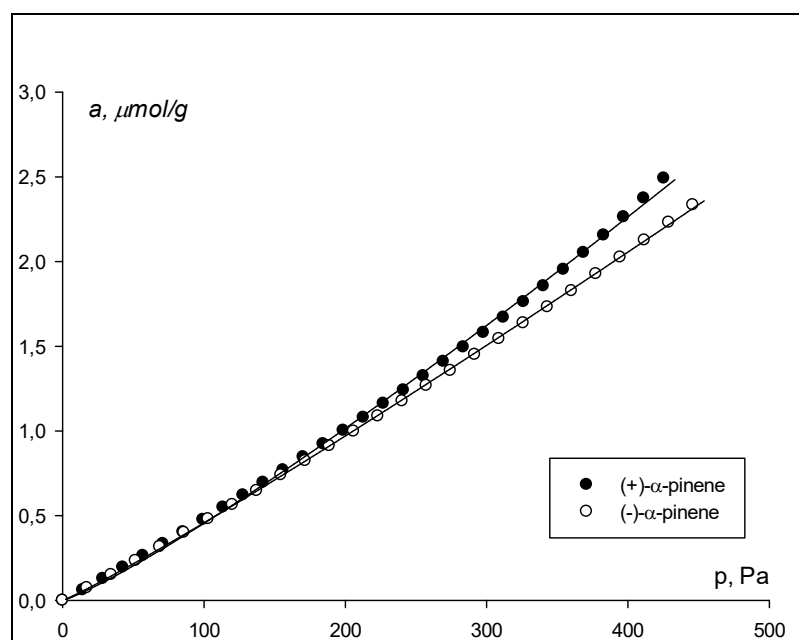

**Figure S1.** Isotherms of  $\alpha$ -pinenes vapors adsorption at 80 °C by  $\text{CsCuCl}_3$  crystals.

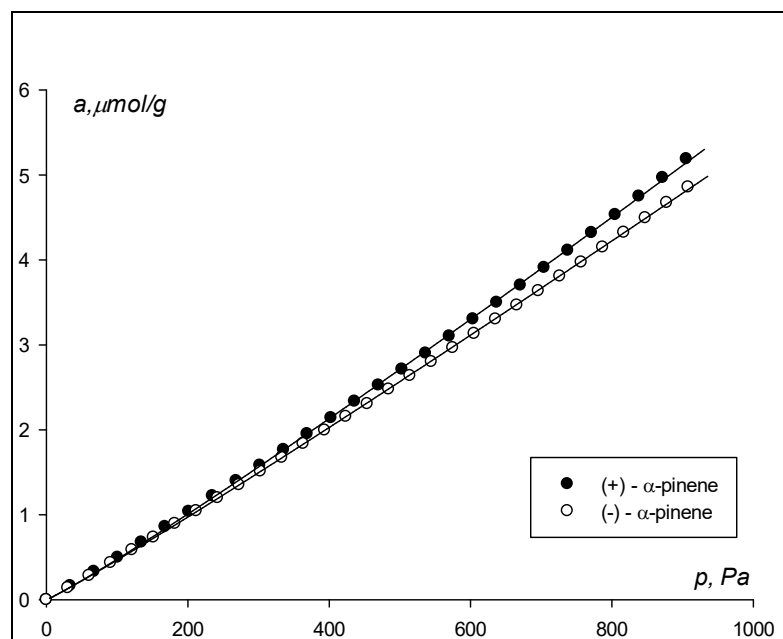

**Figure S2.** Isotherms of  $\alpha$ -pinenes vapors adsorption at 110 °C by  $\text{CsCuCl}_3$  crystals.

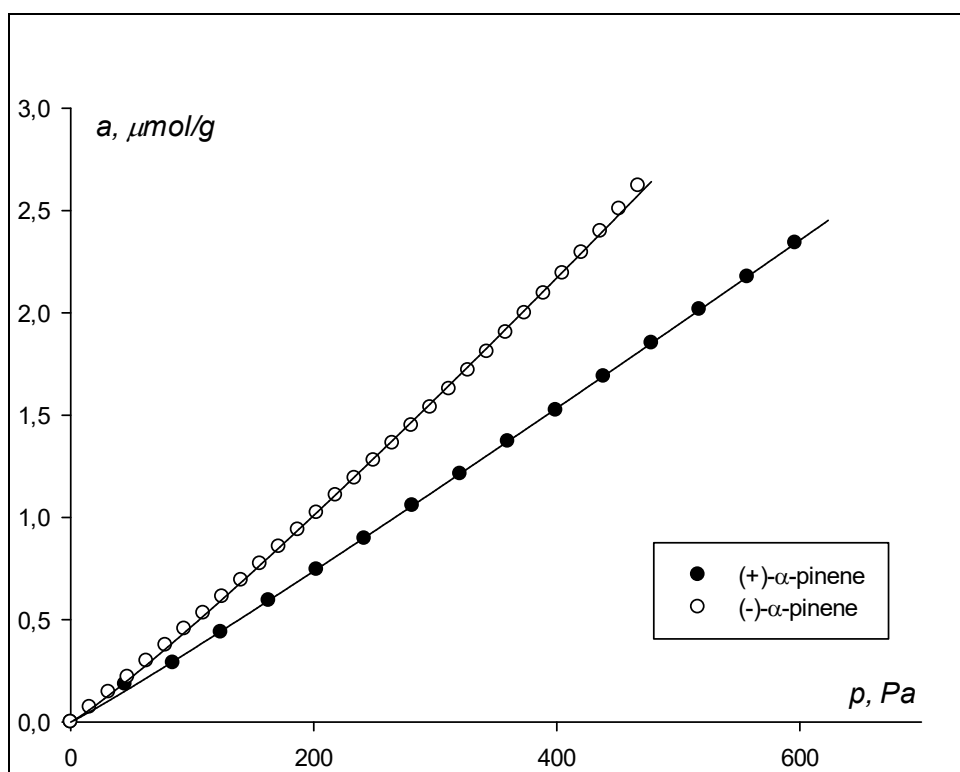

**Figure S3.** Isotherms of  $\alpha$ -pinenes vapors adsorption at 120 °C by  $\text{CsCuCl}_3$  crystals.

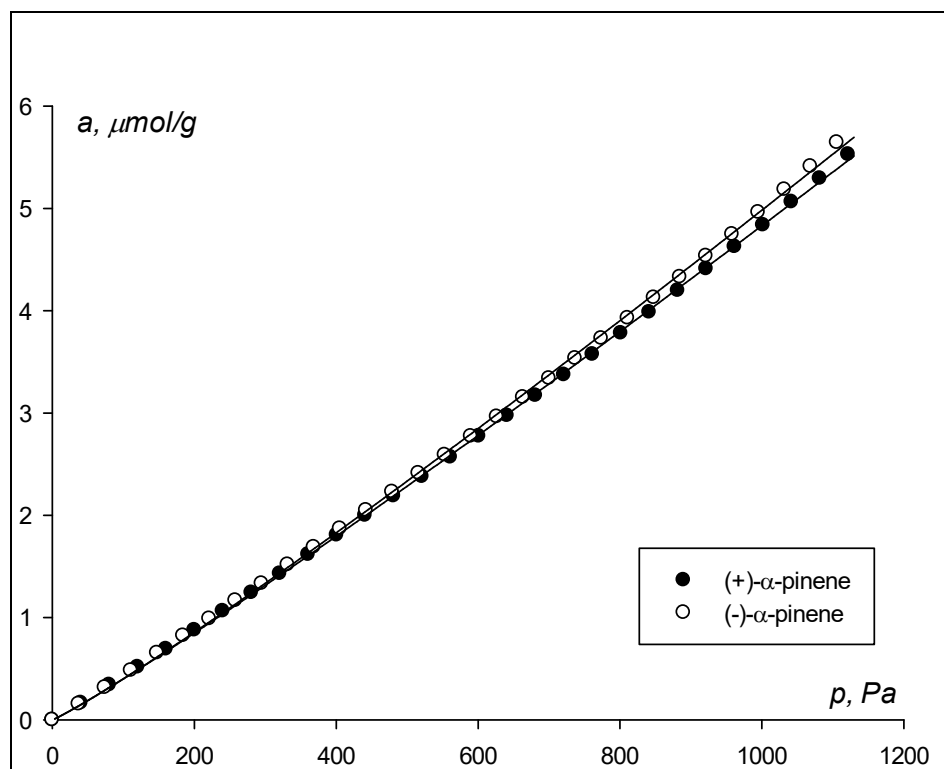

**Figure S4.** Isotherms of  $\alpha$ -pinenes vapors adsorption at 130 °C by  $\text{CsCuCl}_3$  crystals.

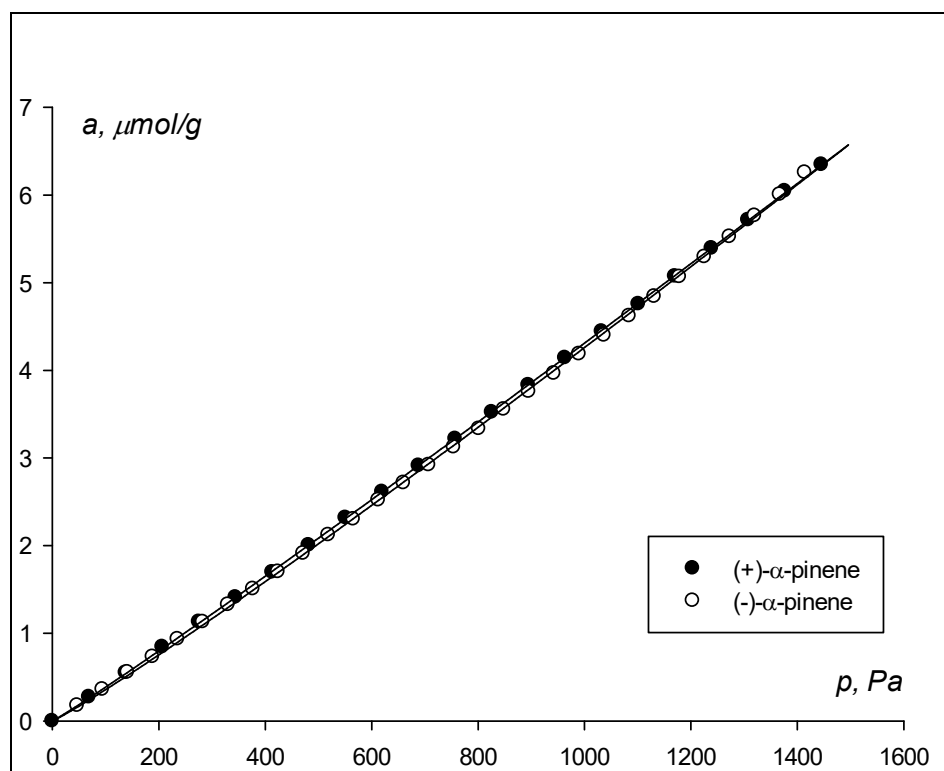

**Figure S5.** Isotherms of  $\alpha$ -pinenes vapors adsorption at 140 °C by  $\text{CsCuCl}_3$  crystals.

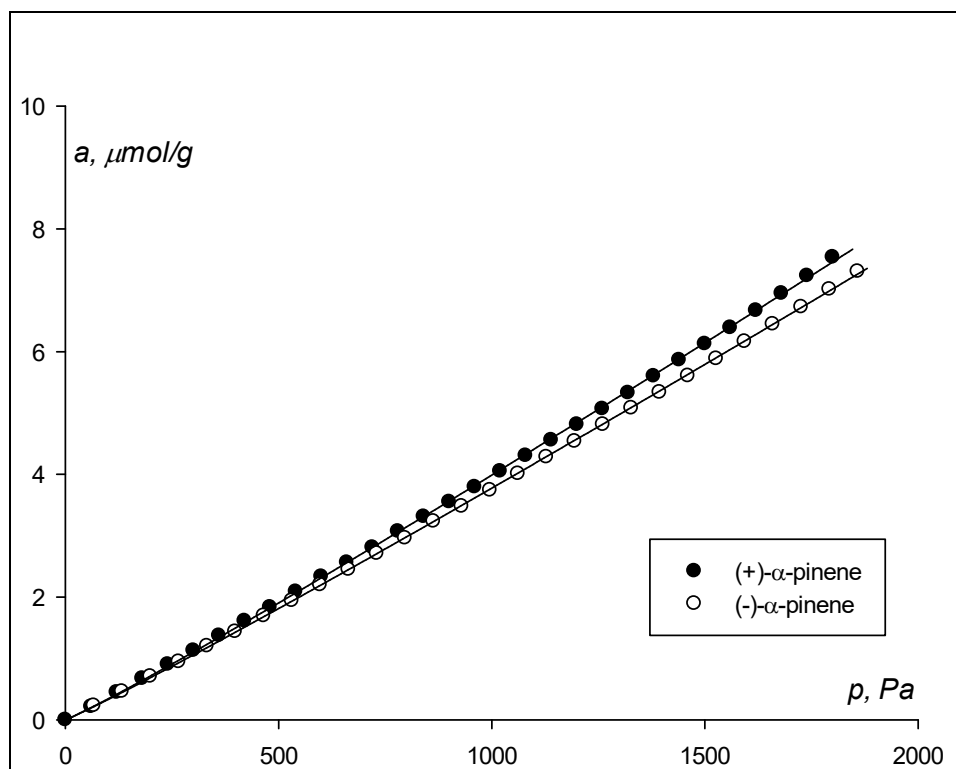

**Figure S6.** Isotherms of  $\alpha$ -pinenes vapors adsorption at 150 °C by  $\text{CsCuCl}_3$  crystals.

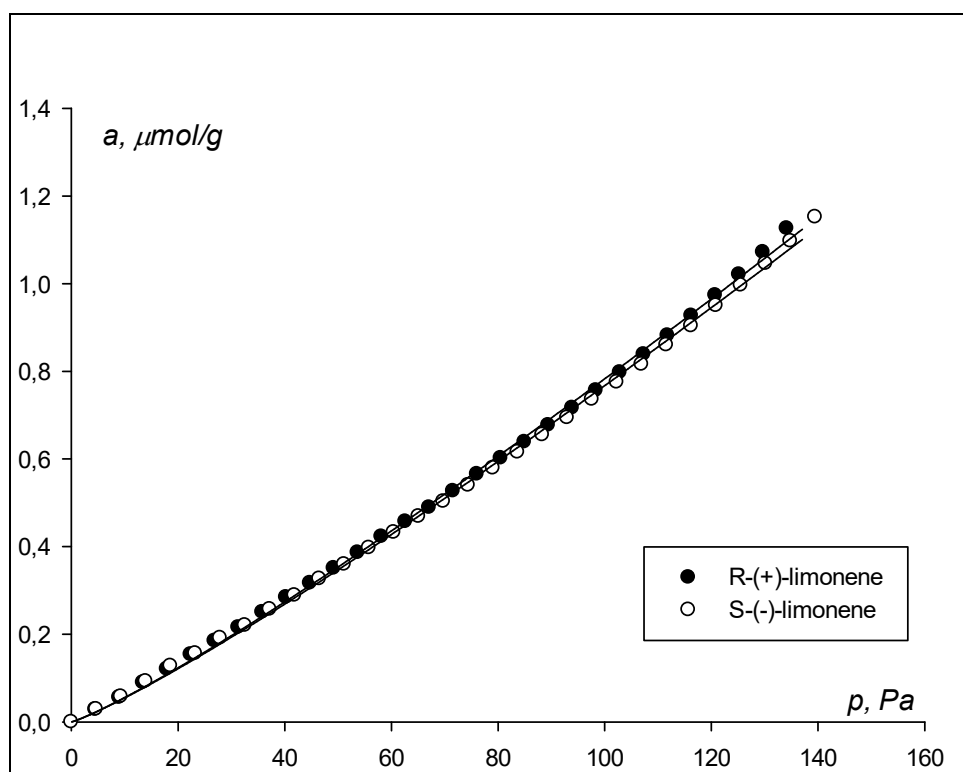

**Figure S7.** Isotherms of limonene vapors adsorption at 80 °C by CsCuCl<sub>3</sub> crystals.

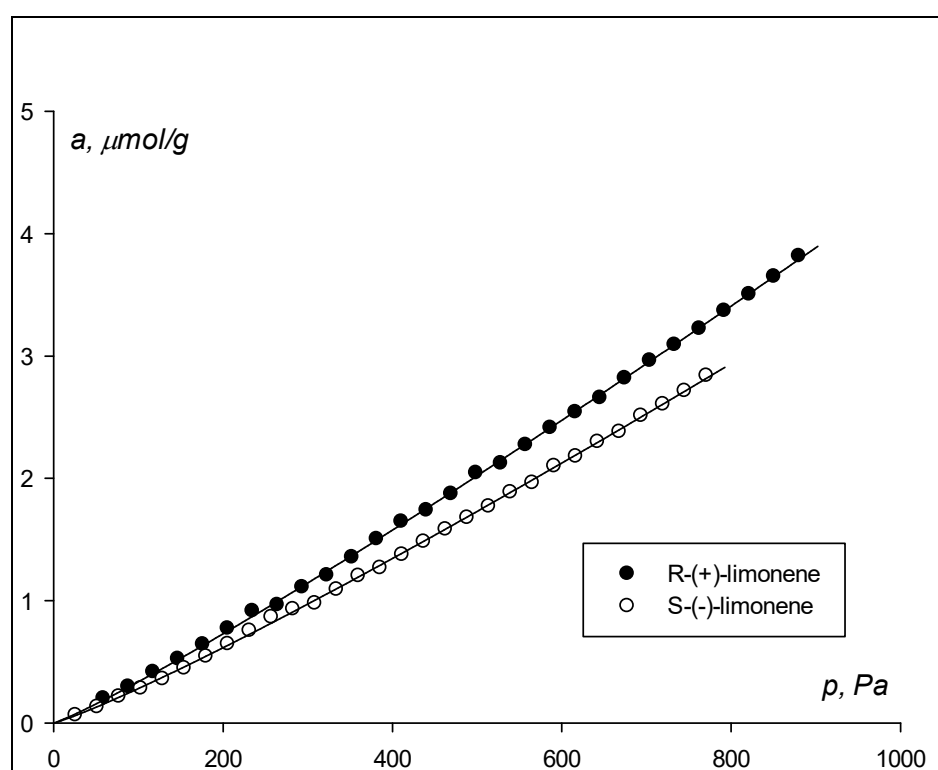

**Figure S8.** Isotherms of limonene vapors adsorption at 130 °C by CsCuCl<sub>3</sub> crystals.

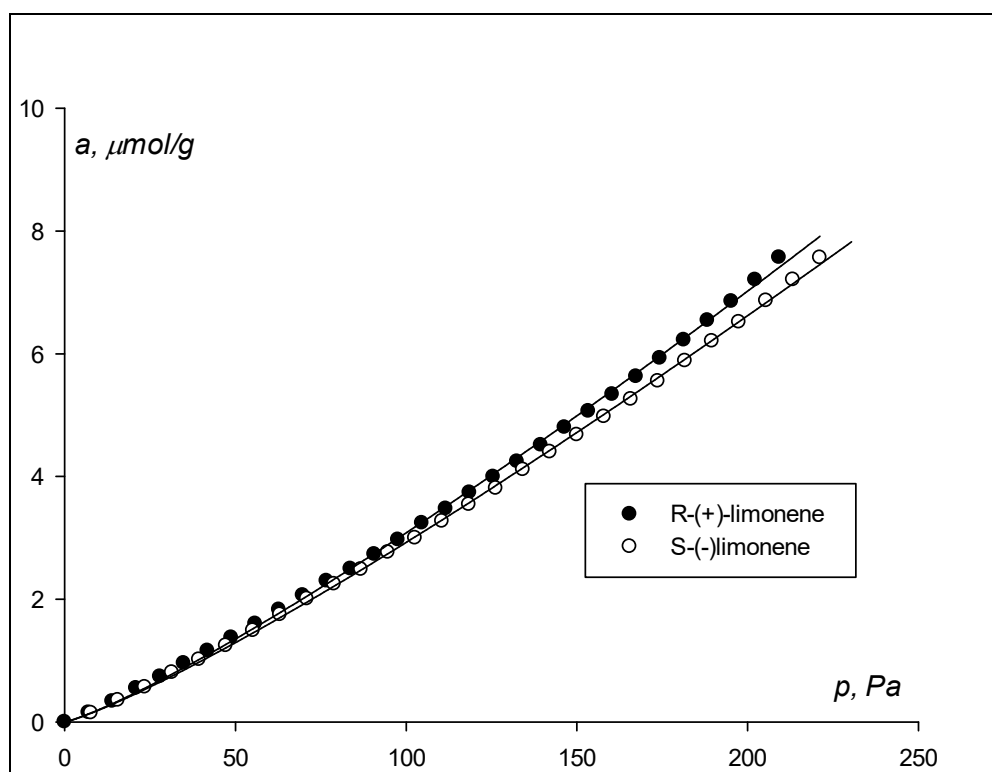

**Figure S9.** Isotherms of limonene vapors adsorption at 100 °C by  $\gamma$ - glycine crystals.

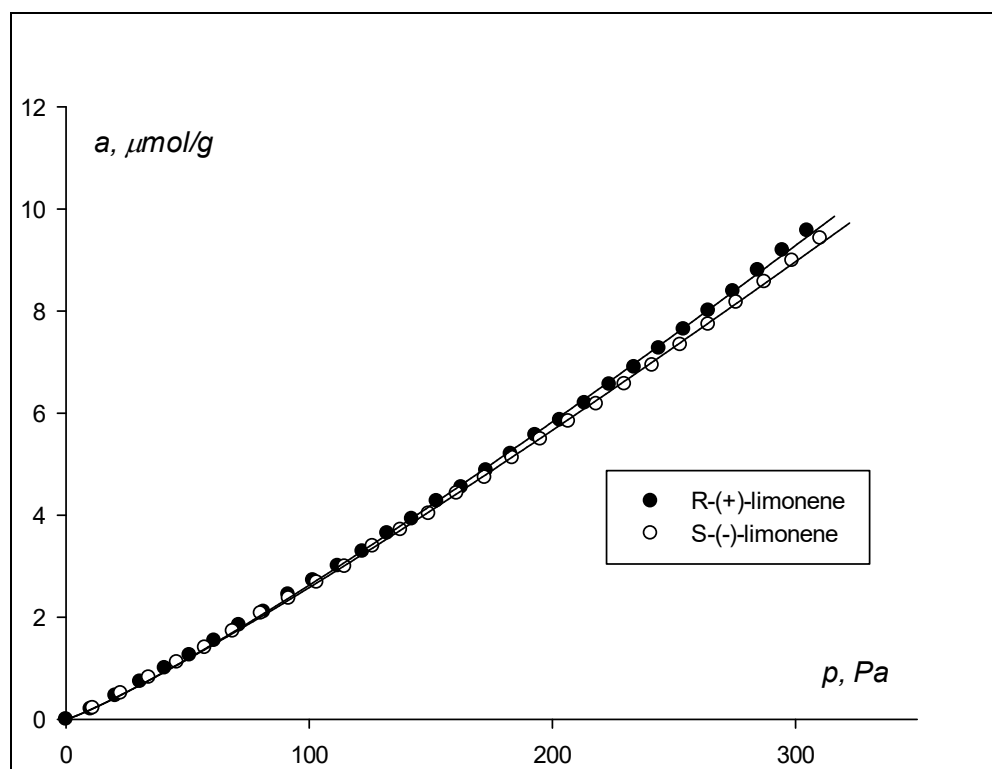

**Figure S10.** Isotherms of limonene vapors adsorption at 110 °C by  $\gamma$ - glycine crystals.

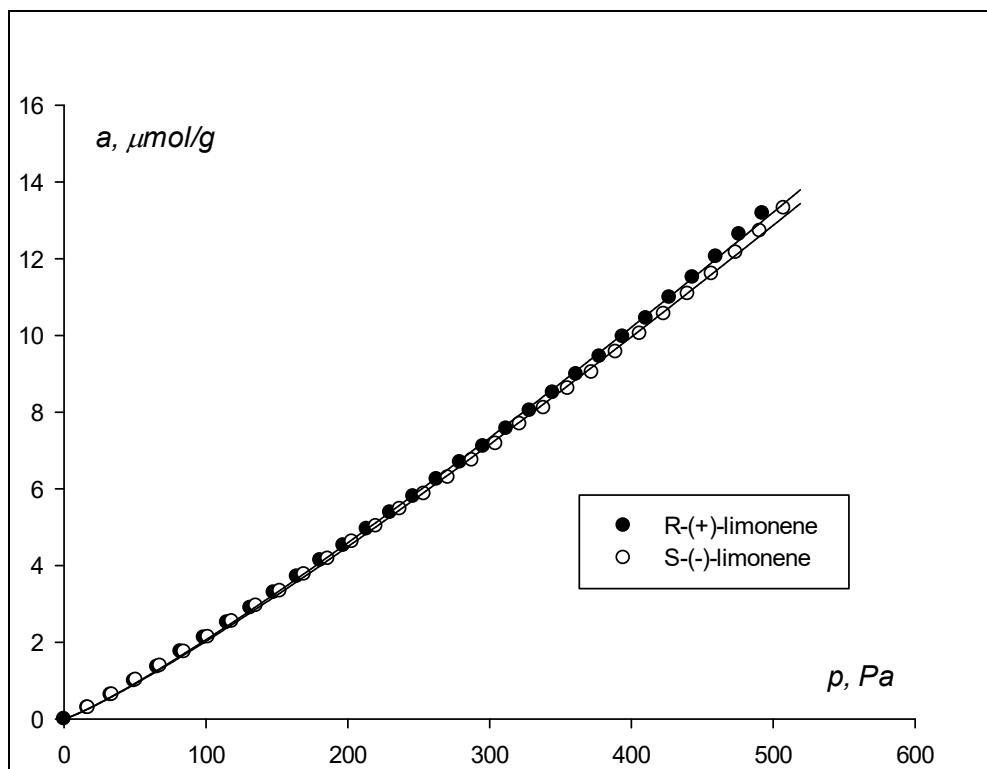

**Figure S11.** Isotherms of limonene vapors adsorption at 120 °C by  $\gamma$ - glycine crystals.

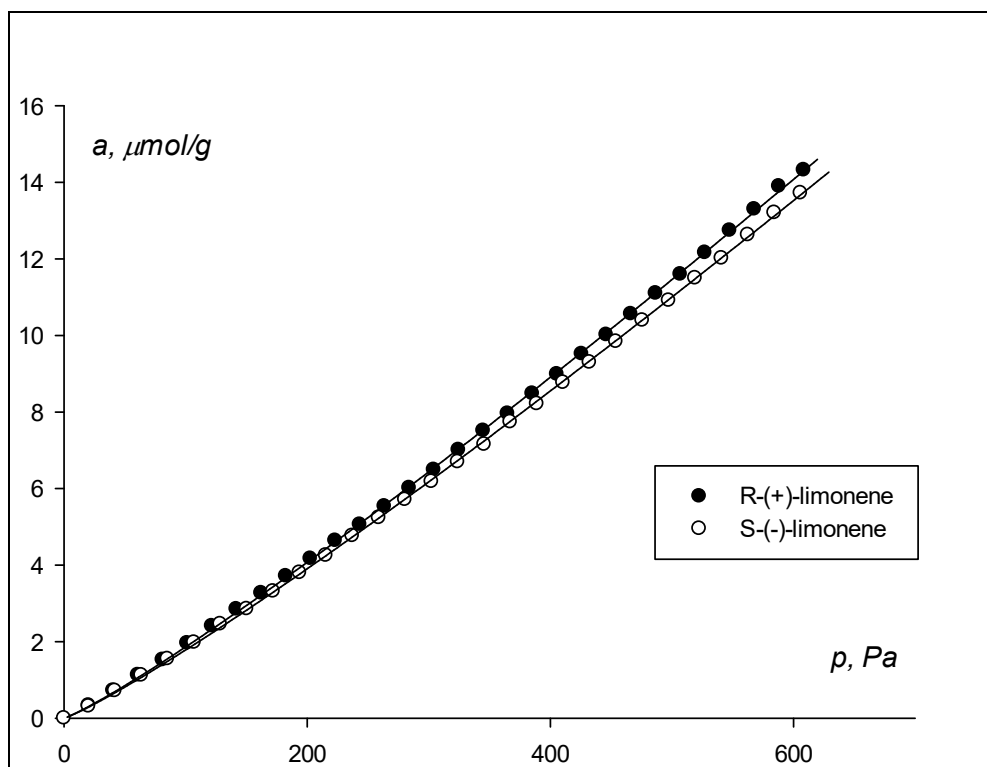

**Figure S12.** Isotherms of limonene vapors adsorption at 130 °C by  $\gamma$ - glycine crystals.

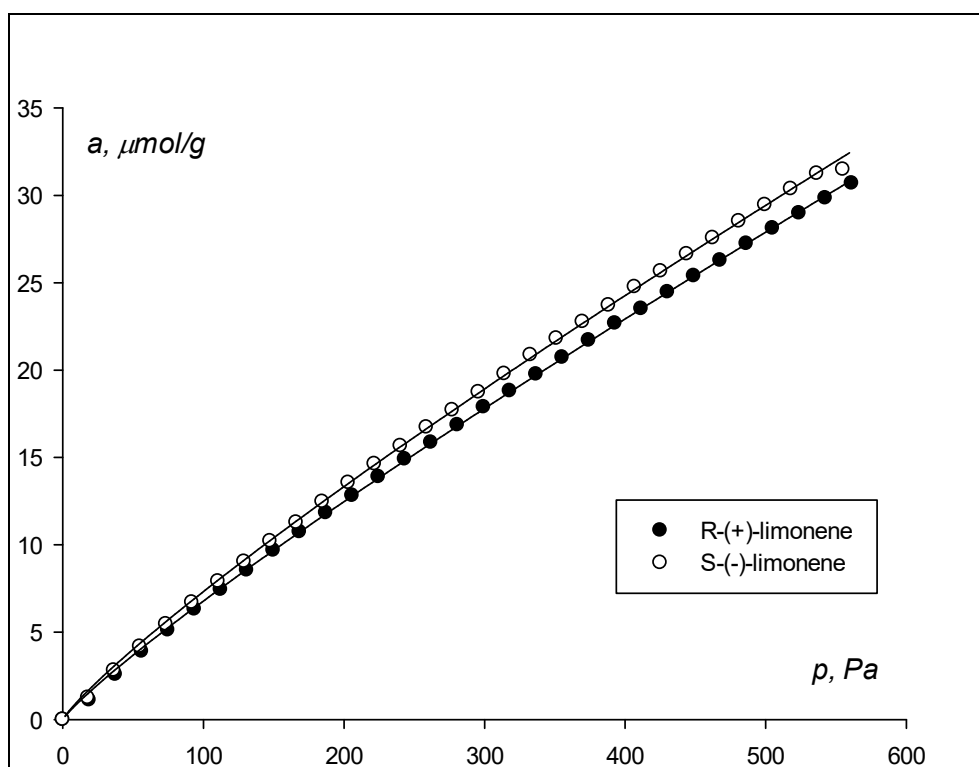

**Figure S13.** Isotherms of limonene vapors adsorption at 140 °C by  $\gamma$ - glycine crystals.

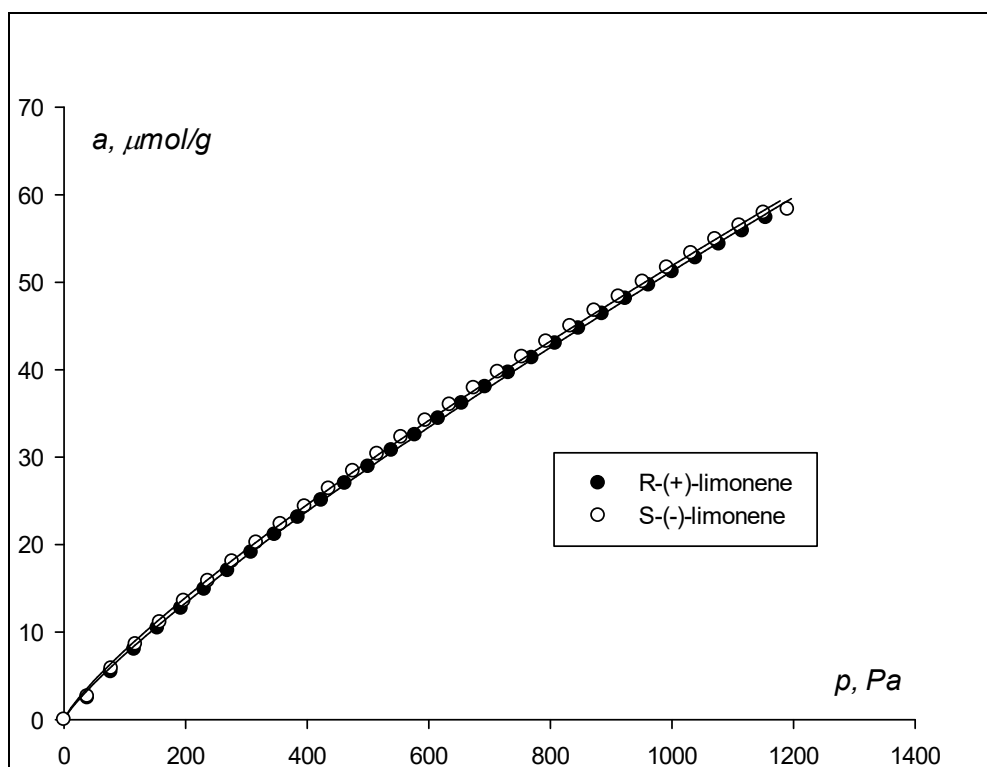

**Figure S14.** Isotherms of limonene vapors adsorption at 160 °C by  $\gamma$ - glycine crystals.

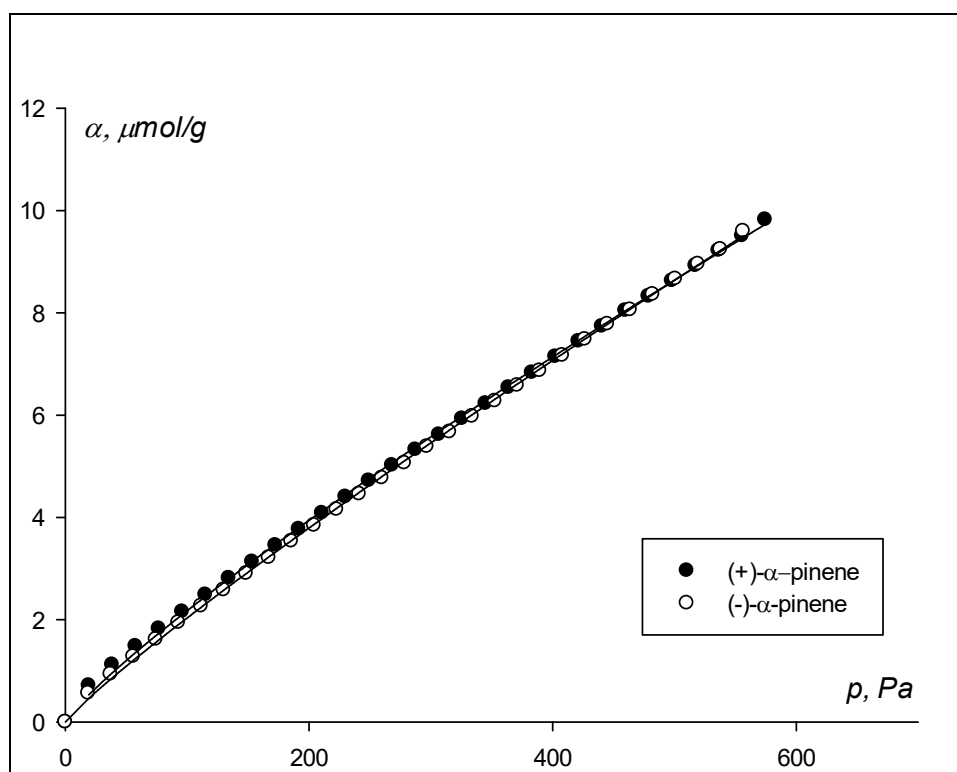

**Figure S15.** Isotherms of  $\alpha$ -pinenes vapors adsorption at 80 °C by  $\gamma$ -glycine crystals.

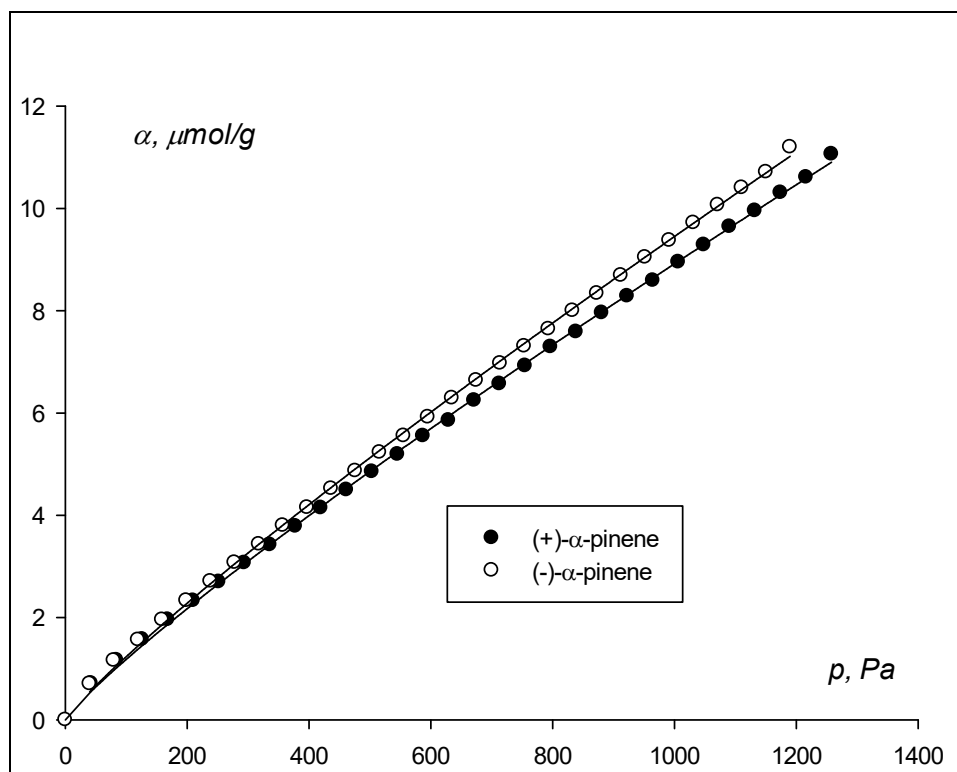

**Figure S16.** Isotherms of  $\alpha$ -pinenes vapors adsorption at 100 °C by  $\gamma$ -glycine crystals.



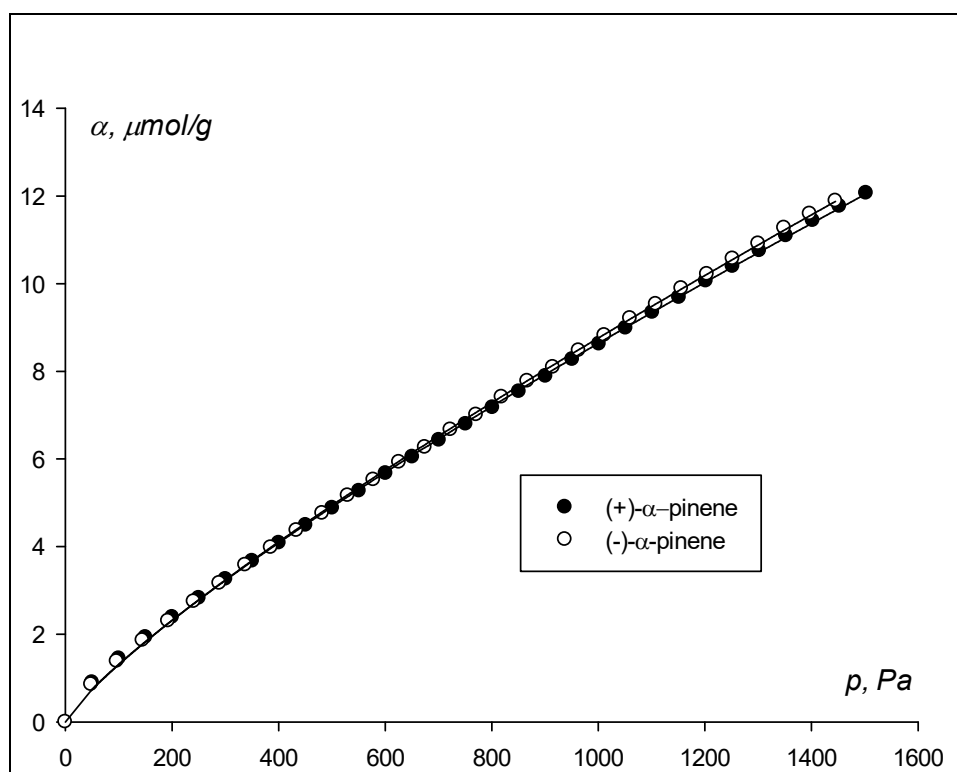

**Figure S17.** Isotherms of  $\alpha$ -pinenes vapors adsorption at 110 °C by  $\gamma$ -glycine crystals.

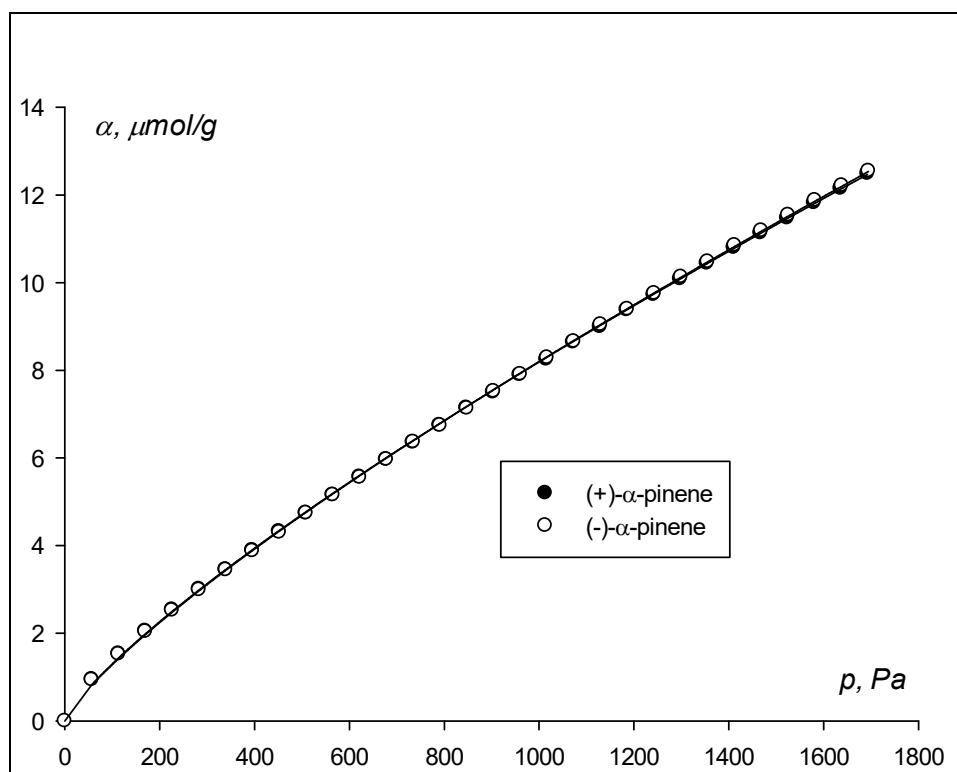

**Figure S18.** Isotherms of  $\alpha$ -pinenes vapors adsorption at 120 °C by  $\gamma$ -glycine crystals.

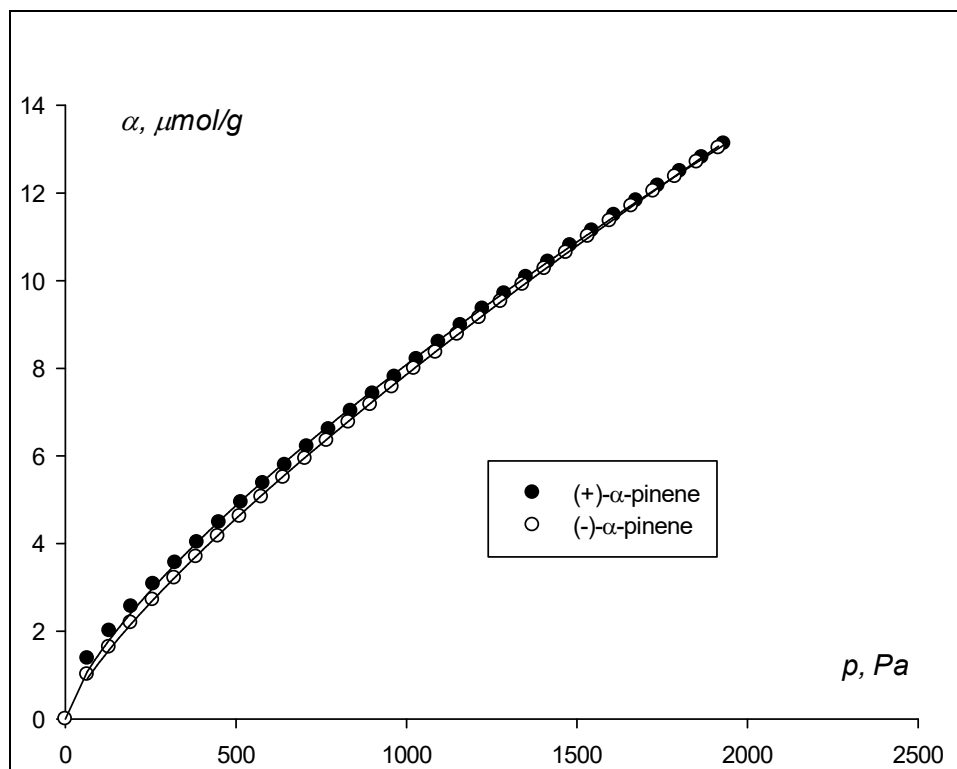

**Figure S19.** Isotherms of  $\alpha$ -pinenes vapors adsorption at 130 °C by  $\gamma$ -glycine crystals.

**Table S1.** The results of approximation of limonene enantiomers adsorption isotherms on  $\gamma$ - glycine crystals by Freundlich equation.

| T, °C | $K_f \cdot 10^1$ |          | n           |             |
|-------|------------------|----------|-------------|-------------|
|       | R-(+)            | S(-)     | R-(+)       | S(-)        |
| 90    | 2.3±0.04         | 2.2±0.04 | 0.815±0.008 | 0.823±0,006 |
| 100   | 2.0±0.05         | 1.9±0.04 | 0.842±0.009 | 0.849±0.007 |
| 110   | 1.9±0.04         | 1.9±0.03 | 0.871±0.007 | 0.864±0.013 |
| 120   | 1.5±0.04         | 1.4±0.04 | 0.867±0.007 | 0.870±0.007 |
| 130   | 1.4±0.02         | 1.3±0.02 | 0.886±0.004 | 0.868±0.011 |

**Table S2.** The results of approximation of limonene enantiomers adsorption isotherms on CsCuCl<sub>3</sub> crystals by Freundlich equation.

| T, °C | K <sub>f</sub> *10 <sup>3</sup> |         | n        |          |
|-------|---------------------------------|---------|----------|----------|
|       | R-(+)                           | S-(-)   | R-(+)    | S-(-)    |
| 80    | 3.9±0.2                         | 4.0±0.2 | 0.87±0.1 | 0.87±0.1 |
| 100   | 3.6±0.1                         | 3.7±0.1 | 0.91±0.1 | 0.91±0.1 |
| 120   | 2.5±0.1                         | 2.3±0.1 | 0.91±0.1 | 0.90±0.1 |
| 130   | 2.0±0.1                         | 1.6±0.1 | 0.90±0.1 | 0.89±0.1 |

**Table S3.** The results of approximation of  $\alpha$ -pinene enantiomers adsorption isotherms on CsCuCl<sub>3</sub> crystals by Freundlich equation.

| T, °C | K <sub>f</sub> *10 <sup>3</sup> |         | n           |             |
|-------|---------------------------------|---------|-------------|-------------|
|       | R-(+)                           | S-(-)   | R-(+)       | S-(-)       |
| 80    | 2.2±0.1                         | 3.1±0.1 | 0.860±0.011 | 0.920±0.004 |
| 100   | 3.4±0.1                         | 3.5±0.1 | 0.910±0.005 | 0.930±0.003 |
| 110   | 3.1±0.1                         | 3.6±0.1 | 0.920±0.005 | 0.940±0.002 |
| 120   | 2.9±0.1                         | 2.7±0.1 | 0.910±0.007 | 0.950±0.006 |
| 130   | 2.6±0.1                         | 2.6±0.1 | 0.920±0.006 | 0.910±0.006 |
| 140   | 2.6±0.1                         | 2.5±0.1 | 0.930±0.005 | 0.930±0.004 |
| 150   | 2.5±0.1                         | 2.4±0.1 | 0.940±0.004 | 0.940±0.003 |

**Table S4.** P-values for pairs of points of limonenes adsorption isotherms on  $\gamma$ -glycine crystals at 100 °C ( $\alpha = 0.05$ ).

| P, Pa | p      | P, Pa | p      | P, Pa | p      |
|-------|--------|-------|--------|-------|--------|
| 0.7   | 0.2501 | 10.8  | 0.3659 | 16.6  | 0.0756 |
| 1.4   | 0.0199 | 11.5  | 0.4172 | 17.4  | 0.3346 |
| 7.3   | 0.1103 | 12.3  | 0.2163 | 18.1  | 0.4641 |
| 8.0   | 0.2362 | 13.0  | 0.1752 | 18.8  | 0.5849 |
| 8.8   | 0.8444 | 13.9  | 0.1013 | 19.5  | 0.6044 |
| 9.5   | 0.8052 | 14.5  | 0.0839 | 20.3  | 0.7399 |
| 10.1  | 0.5798 | 15.4  | 0.0820 | 21.0  | 0.7459 |

**Table S5.** P-values for pairs of points of limonenes adsorption isotherms on  $\gamma$ -glycine crystals at 110 °C ( $\alpha = 0.05$ ).

| <b>P, Pa</b> | <b>p</b> | <b>P, Pa</b> | <b>p</b> | <b>P, Pa</b> | <b>p</b> |
|--------------|----------|--------------|----------|--------------|----------|
| 1.0          | 0.7426   | 11.1         | 0.6732   | 20.2         | 0.4082   |
| 2.0          | 0.1882   | 12.1         | 0.9237   | 21.2         | 0.4850   |
| 3.0          | 0.2289   | 13.1         | 0.8214   | 22.2         | 0.5699   |
| 4.0          | 0.0847   | 14.1         | 0.6605   | 23.2         | 0.6278   |
| 5.0          | 0.0720   | 15.1         | 0.7472   | 24.3         | 0.7269   |
| 6.0          | 0.0579   | 16.2         | 0.4020   | 25.3         | 0.8540   |
| 9.1          | 0.1302   | 17.2         | 0.4983   | 29.3         | 0.2097   |
| 10.1         | 0.2603   | 19.2         | 0.2938   | 30.3         | 0.2288   |

**Table S6.** P-values for pairs of points of limonenes adsorption isotherms on  $\gamma$ -glycine crystals at 120 °C ( $\alpha = 0.05$ ).

| <b>P, Pa</b> | <b>p</b> | <b>P, Pa</b> | <b>p</b> | <b>P, Pa</b> | <b>p</b> |
|--------------|----------|--------------|----------|--------------|----------|
| 1.6          | 0.9437   | 18.0         | 0.6124   | 34.4         | 0.6010   |
| 3.2          | 0.5587   | 19.6         | 0.4483   | 36.1         | 0.8243   |
| 4.9          | 0.5589   | 21.3         | 0.5018   | 37.7         | 0.5999   |
| 6.5          | 0.5604   | 22.9         | 0.5850   | 39.3         | 0.7415   |
| 8.1          | 0.7526   | 24.6         | 0.5959   | 41.0         | 0.6745   |
| 9.8          | 0.7815   | 26.2         | 0.7793   | 42.6         | 0.7424   |
| 11.4         | 0.0007   | 27.8         | 0.7390   | 44.3         | 0.7449   |
| 13.1         | 0.5286   | 29.5         | 0.6854   | 45.9         | 0.7370   |
| 14.7         | 0.6622   | 31.1         | 0.5285   | 47.6         | 0.7757   |
| 16.4         | 0.6041   | 32.8         | 0.6866   | 49.2         | 0.6580   |

**Table S7.** P-values for pairs of points of limonenes adsorption isotherms on  $\gamma$ -glycine crystals at 130 °C ( $\alpha = 0.05$ ).

| <b>P, Pa</b> | <b>p</b> | <b>P, Pa</b> | <b>p</b> |
|--------------|----------|--------------|----------|
| 2.0          | 0.0866   | 22.2         | 0.2707   |
| 4.0          | 0.9593   | 28.3         | 0.0970   |
| 6.2          | 0.8974   | 30.4         | 0.1215   |
| 8.0          | 0.5366   | 32.4         | 0.1301   |
| 10.1         | 0.7136   | 34.4         | 0.0940   |
| 12.1         | 0.5221   | 36.4         | 0.3126   |
| 14.1         | 0.9439   | 38.5         | 0.2122   |
| 16.2         | 0.5032   | 54.7         | 0.0655   |
| 18.2         | 0.4469   | 56.7         | 0.0789   |
| 20.2         | 0.5248   | 58.8         | 0.0800   |

**Table S8.** P-values for pairs of points of limonenes adsorption isotherms on  $\gamma$ -glycine crystals at 140 °C ( $\alpha = 0.05$ ).

| <b>P, Pa</b> | <b>p</b> | <b>P, Pa</b> | <b>p</b> | <b>P, Pa</b> | <b>p</b> |
|--------------|----------|--------------|----------|--------------|----------|
| 1.8          | 0.6567   | 14.7         | 0.0066   | 27.5         | 0.0050   |
| 3.6          | 0.1291   | 16.5         | 0.0025   | 29.4         | 0.0091   |
| 5.5          | 0.0299   | 18.3         | 0.0061   | 31.2         | 0.0089   |
| 7.3          | 0.00881  | 20.2         | 0.0053   | 33.0         | 0.0101   |
| 9.2          | 0.0058   | 22.0         | 0.0059   | 34.9         | 0.0095   |
| 11.0         | 0.0060   | 23.9         | 0.0058   | 36.7         | 0.0088   |
| 12.8         | 0.0017   | 25.7         | 0.0058   | 38.6         | 0.0083   |

**Table S9.** P-values for pairs of points of limonenes adsorption isotherms on  $\gamma$ -glycine crystals at 160 °C ( $\alpha = 0.05$ ).

| <b>P, Pa</b> | <b>p</b> | <b>P, Pa</b> | <b>p</b> | <b>P, Pa</b> | <b>p</b> |
|--------------|----------|--------------|----------|--------------|----------|
| 3.8          | 0.1911   | 26.9         | 0.0106   | 100.0        | 0.4132   |
| 7.6          | 0.0221   | 30.7         | 0.0081   | 103.9        | 0.2759   |
| 11.5         | 0.0114   | 34.6         | 0.0128   | 107.7        | 0.9376   |
| 15.3         | 0.0119   | 38.4         | 0.0137   | 111.6        | 0.9496   |
| 19.2         | 0.0094   | 80.8         | 0.6814   | 115.4        | 0.9124   |
| 23.0         | 0.0139   | 88.5         | 0.5433   |              |          |

**Table S10.** P-values for pairs of points of  $\alpha$ -pinenes adsorption isotherms on CsCuCl<sub>3</sub> crystals at 80 °C ( $\alpha = 0.05$ ).

| <b>P, Pa</b> | <b>p</b> | <b>P, Pa</b> | <b>p</b> | <b>P, Pa</b> | <b>p</b> |
|--------------|----------|--------------|----------|--------------|----------|
| 102.5        | 0.4259   | 239.1        | 0.0032   | 341.6        | 0.0039   |
| 119.5        | 0.0589   | 256.2        | 0.0072   | 358.6        | 0.0039   |
| 136.6        | 0.014    | 273.2        | 0.0224   | 375.7        | 0.0044   |
| 153.7        | 0.0177   | 290.3        | 0.0345   | 392.8        | 0.0002   |
| 170.8        | 0.0301   | 307.4        | 0.0009   | 409.9        | 0.0002   |
| 222.0        | 0.0012   | 324.5        | 0.0012   | 427.0        | 0.0002   |

**Table S11.** P-values for pairs of points of  $\alpha$ -pinenes adsorption isotherms on CsCuCl<sub>3</sub> crystals at 100 °C ( $\alpha = 0.05$ ).

| <b>P, Pa</b> | <b>p</b> | <b>P, Pa</b> | <b>p</b> | <b>P, Pa</b> | <b>p</b> |
|--------------|----------|--------------|----------|--------------|----------|
| 138.9        | 0.0009   | 312.4        | 0.0046   | 490.9        | 0.0010   |
| 156.2        | 0.0105   | 334.7        | 0.0103   | 513.2        | 0.0011   |
| 178.5        | 0.0592   | 357.0        | 0.0227   | 535.5        | 0.0010   |
| 200.8        | 0.0849   | 379.3        | 0.0047   | 557.8        | 0.0010   |
| 223.1        | 0.0377   | 401.6        | 0.0063   | 580.1        | 0.0103   |
| 245.4        | 0.0013   | 423.9        | 0.0012   | 602.4        | 0.0002   |
| 267.8        | 0.0010   | 446.3        | 0.0022   | 624.8        | 0.0002   |
| 290.1        | 0.0016   | 468.6        | 0.0006   | 647.1        | 0.0001   |

**Table S12.** P-values for pairs of points of  $\alpha$ -pinenes adsorption isotherms on CsCuCl<sub>3</sub> crystals at 110 °C ( $\alpha = 0.05$ ).

| <b>P, Pa</b> | <b>p</b> | <b>P, Pa</b> | <b>p</b> | <b>P, Pa</b> | <b>p</b> |
|--------------|----------|--------------|----------|--------------|----------|
| 30.6         | 0.0042   | 367.5        | 0.0526   | 643.1        | 0.0479   |
| 61.2         | 0.0054   | 398.1        | 0.0305   | 673.7        | 0.0052   |
| 91.9         | 0.0008   | 428.7        | 0.0225   | 704.3        | 0.0025   |
| 122.5        | 0.0047   | 459.3        | 0.0149   | 734.9        | 0.0181   |
| 153.1        | 0.0039   | 490.0        | 0.0039   | 765.6        | 0.0015   |
| 183.7        | 0.0023   | 520.6        | 0.0031   | 796.2        | 0.0009   |
| 214.4        | 0.0020   | 551.2        | 0.0008   | 826.8        | 0.0006   |
| 306.2        | 0.0811   | 581.8        | 0.0012   | 857.4        | 0.0005   |
| 336.9        | 0.0471   | 612.5        | 0.0005   | 888.1        | 0.0004   |

**Table S13.** P-values for pairs of points of  $\alpha$ -pinenes adsorption isotherms on CsCuCl<sub>3</sub> crystals at 130 °C ( $\alpha = 0.05$ ).

| <b>P, Pa</b> | <b>p</b> | <b>P, Pa</b> | <b>p</b> | <b>P, Pa</b> | <b>p</b> |
|--------------|----------|--------------|----------|--------------|----------|
| 221.2        | 0.0037   | 516.0        | 0.2685   | 810.9        | 0.0059   |
| 258.0        | 0.0054   | 552.9        | 0.3698   | 847.8        | 0.0078   |
| 294.9        | 0.0050   | 589.7        | 0.9241   | 884.6        | 0.0106   |
| 331.7        | 0.0143   | 626.6        | 0.6958   | 921.5        | 0.0139   |
| 368.6        | 0.0143   | 663.5        | 0.5585   | 958.3        | 0.0174   |
| 405.5        | 0.0161   | 700.3        | 0.2247   | 995.2        | 0.0132   |
| 442.3        | 0.0687   | 737.2        | 0.0037   | 1032.1       | 0.0203   |
| 479.2        | 0.074    | 774.0        | 0.0030   | 1068.9       | 0.0221   |

**Table S14.** P-values for pairs of points of  $\alpha$ -pinenes adsorption isotherms on CsCuCl<sub>3</sub> crystals at 140 °C ( $\alpha = 0.05$ ).

| <b>P, Pa</b> | <b>p</b> | <b>P, Pa</b> | <b>p</b> | <b>P, Pa</b> | <b>p</b> |
|--------------|----------|--------------|----------|--------------|----------|
| 205.2        | 0.0048   | 615.6        | 0.4229   | 957.6        | 0.1477   |
| 273.6        | 0.9885   | 684.0        | 0.0144   | 1026.0       | 0.2079   |
| 342.0        | 0.5083   | 752.4        | 0.5109   | 1094.4       | 0.0012   |
| 410.4        | 0.1908   | 820.8        | 0.0624   | 1162.8       | 0.5193   |
| 478.8        | 0.5229   | 889.2        | 0.0649   | 1231.2       | 0.0163   |

**Table S15.** P-values for pairs of points of  $\alpha$ -pinenes adsorption isotherms on CsCuCl<sub>3</sub> crystals at 150 °C ( $\alpha = 0.05$ ).

| <b>P, Pa</b> | <b>p</b> | <b>P, Pa</b> | <b>p</b> | <b>P, Pa</b> | <b>p</b> |
|--------------|----------|--------------|----------|--------------|----------|
| 66.4         | 0.0051   | 797.2        | 0.1138   | 1262.3       | 0.0461   |
| 132.9        | 0.2723   | 863.7        | 0.0429   | 1328.7       | 0.0043   |
| 465.1        | 0.0163   | 930.1        | 0.0068   | 1395.2       | 0.0033   |
| 531.5        | 0.019    | 996.6        | 0.0083   | 1461.6       | 0.0037   |
| 597.9        | 0.0251   | 1063.0       | 0.0068   | 1594.5       | 0.0007   |
| 664.4        | 0.0226   | 1129.4       | 0.0061   | 1660.9       | 0.0007   |
| 730.8        | 0.0876   | 1195.9       | 0.0079   | 1727.4       | 0.0007   |

**Table S16.** P-values for pairs of points of limonenes adsorption isotherms on CsCuCl<sub>3</sub> crystals at 80 °C ( $\alpha = 0.05$ ).

| <b>P,Pa</b> | <b>p</b> | <b>P,Pa</b> | <b>p</b> | <b>P,Pa</b> | <b>p</b> |
|-------------|----------|-------------|----------|-------------|----------|
| 4.50        | 0.80     | 41.05       | 0.53     | 102.57      | 0.10     |
| 9.12        | 0.25     | 45.60       | 0.10     | 107.13      | 0.11     |
| 13.70       | 0.42     | 50.17       | 0.29     | 111.69      | 0.13     |
| 18.27       | 0.02     | 59.28       | 0.12     | 116.25      | 0.11     |
| 22.82       | 0.49     | 70.64       | 0.03     | 120.81      | 0.14     |
| 27.37       | 0.14     | 75.20       | 0.02     | 125.37      | 0.13     |
| 31.92       | 0.30     | 84.33       | 0.06     | 129.93      | 0.13     |
| 36.48       | 0.25     | 93.44       | 0.09     | 134.49      | 0.11     |

**Table S17.** P-values for pairs of points of limonenes adsorption isotherms on CsCuCl<sub>3</sub> crystals at 100 °C ( $\alpha = 0.05$ ).

| <b>P,Pa</b> | <b>p</b>             | <b>P,Pa</b> | <b>p</b>              | <b>P,Pa</b> | <b>p</b>             |
|-------------|----------------------|-------------|-----------------------|-------------|----------------------|
| 12.32       | 1.1*10 <sup>-6</sup> | 79.57       | 1.02*10 <sup>-6</sup> | 151.96      | 9.0*10 <sup>-8</sup> |
| 21.31       | 9.1*10 <sup>-6</sup> | 91.89       | 3.6*10 <sup>-7</sup>  | 160.95      | 9.7*10 <sup>-8</sup> |
| 33.63       | 2.8*10 <sup>-3</sup> | 106.02      | 6.4*10 <sup>-7</sup>  | 173.27      | 5.5*10 <sup>-8</sup> |
| 45.94       | 1.6*10 <sup>-6</sup> | 115.01      | 2.8*10 <sup>-7</sup>  | 185.59      | 3.4*10 <sup>-8</sup> |
| 54.93       | 1.2*10 <sup>-6</sup> | 127.33      | 4.5*10 <sup>-7</sup>  | 194.58      | 2.9*10 <sup>-8</sup> |

**Table S18.** P-values for pairs of points of limonenes adsorption isotherms on CsCuCl<sub>3</sub> crystals at 120 °C ( $\alpha = 0.05$ ).

| <b>P,Pa</b> | <b>p</b> | <b>P,Pa</b> | <b>p</b> | <b>P,Pa</b> | <b>p</b> |
|-------------|----------|-------------|----------|-------------|----------|
| 37.26       | 0.0004   | 204.94      | 0.0145   | 409.87      | 0.7767   |
| 55.89       | 0.0006   | 260.83      | 0.6686   | 428.50      | 0.6545   |
| 74.52       | 0.0009   | 279.46      | 0.6838   | 447.13      | 0.2859   |
| 93.15       | 0.0013   | 298.09      | 0.7095   | 465.76      | 0.4563   |
| 111.78      | 0.0020   | 316.72      | 0.7499   | 484.39      | 0.1142   |
| 130.41      | 0.0032   | 335.35      | 0.0657   | 503.02      | 0.0566   |
| 149.05      | 0.0050   | 353.98      | 0.0741   | 521.65      | 0.1203   |
| 167.68      | 0.0075   | 372.61      | 0.0963   | 540.28      | 0.1537   |
| 186.31      | 0.0107   | 391.24      | 0.0877   | 558.92      | 0.1072   |

**Table S19.** P-values for pairs of points of limonenes adsorption isotherms on CsCuCl<sub>3</sub> crystals at 130 °C ( $\alpha = 0.05$ ).

| <b>P,Pa</b> | <b>p</b> | <b>P,Pa</b> | <b>p</b> | <b>P,Pa</b> | <b>p</b> |
|-------------|----------|-------------|----------|-------------|----------|
| 29.52       | 0.1100   | 328.35      | 0.4000   | 566.7       | 0.1800   |
| 55.03       | 0.0300   | 355.86      | 0.3200   | 611.32      | 0.2700   |
| 82.54       | 0.0960   | 383.38      | 0.2400   | 638.84      | 0.3000   |
| 110.06      | 0.0630   | 410.89      | 0.2100   | 666.35      | 0.2300   |
| 177.93      | 0.2600   | 460.91      | 0.2900   | 693.87      | 0.2500   |
| 205.46      | 0.2100   | 488.42      | 0.2100   | 721.38      | 0.2200   |
| 232.96      | 0.1600   | 515.94      | 0.2400   | 748.90      | 0.2100   |
| 305.63      | 0.2000   | 543.45      | 0.1900   | 776.41      | 0.2100   |



**Table S20.** P-values for pairs of points of limonenes adsorption isotherms on CsCuCl<sub>3</sub> crystals at 150 °C ( $\alpha = 0.05$ ).

| <b>P,Pa</b> | <b>p</b> | <b>P,Pa</b> | <b>p</b> | <b>P,Pa</b> | <b>p</b> |
|-------------|----------|-------------|----------|-------------|----------|
| 38.08       | 0.0407   | 412.23      | 0.3721   | 754.98      | 0.5766   |
| 76.17       | 0.0341   | 450.31      | 0.3482   | 793.06      | 0.8155   |
| 114.25      | 0.3084   | 488.40      | 0.3184   | 831.15      | 0.8369   |
| 152.33      | 0.1029   | 526.48      | 0.4599   | 869.28      | 0.8130   |
| 190.42      | 0.2172   | 564.56      | 0.4291   | 907.31      | 0.6697   |
| 228.50      | 0.1441   | 564.56      | 0.4291   | 945.40      | 0.7015   |
| 266.58      | 0.3857   | 602.65      | 0.5328   | 983.48      | 0.7492   |
| 304.67      | 0.3409   | 640.59      | 0.8279   | 1021.56     | 0.7617   |
| 336.06      | 0.2073   | 678.82      | 0.6384   | 1059.65     | 0.8180   |
| 374.15      | 0.2846   | 716.90      | 0.6623   | 1097.73     | 0.8597   |

**Table S21.** P-values for pairs of points of menthol adsorption isotherms on silica gel with CsCuCl<sub>3</sub> crystals ( $\alpha = 0.05$ ).

| <b>c, mg/L</b> | <b>P</b>          | <b>c, mg/L</b> | <b>P</b>          | <b>c, mg/L</b> | <b>P</b>           |
|----------------|-------------------|----------------|-------------------|----------------|--------------------|
| 25             | $3 \cdot 10^{-8}$ | 175            | 0.113             | 243.75         | $3 \cdot 10^{-6}$  |
| 50             | $5 \cdot 10^{-5}$ | 200            | $5 \cdot 10^{-6}$ | 250            | $2 \cdot 10^{-11}$ |
| 100            | $2 \cdot 10^{-5}$ | 225            | $3 \cdot 10^{-6}$ | 300            | 0.018              |
| 150            | 0.818             | 237.5          | $1 \cdot 10^{-6}$ |                |                    |

**Table S22.** P-values for pairs of points of  $\alpha$ -pinenes adsorption isotherms on  $\gamma$ -glycine crystals at 80 °C ( $\alpha = \mathbf{0.05}$ ).

| <b>P, Pa</b> | <b>p</b> | <b>P, Pa</b> | <b>p</b> | <b>P, Pa</b> | <b>p</b> |
|--------------|----------|--------------|----------|--------------|----------|
| 18.85        | 0.0455   | 131.94       | 0.0203   | 420.79       | 0.6273   |
| 37.70        | 0.0317   | 279.49       | 0.3303   | 458.48       | 0.5282   |
| 56.54        | 0.0254   | 298.34       | 0.3500   | 477.33       | 0.6441   |
| 113.09       | 0.0237   | 401.94       | 0.6293   | 496.18       | 0.6781   |

**Table S23.** P-values for pairs of points of  $\alpha$ -pinenes adsorption isotherms on  $\gamma$ -glycine crystals at 100 °C ( $\alpha = 0.05$ ).

| <b>P, Pa</b> | <b>p</b> | <b>P, Pa</b> | <b>p</b> | <b>P, Pa</b> | <b>p</b> |
|--------------|----------|--------------|----------|--------------|----------|
| 40.80        | 0.9541   | 597.88       | 0.1234   | 1059.70      | 0.0884   |
| 81.60        | 0.9486   | 747.43       | 0.1846   | 1100.50      | 0.0742   |
| 509.41       | 0.0435   | 978.14       | 0.0759   | 1141.30      | 0.0827   |
| 550.21       | 0.0471   | 1018.9       | 0.0899   | 1182.10      | 0.0702   |

**Table S24.** P-values for pairs of points of  $\alpha$ -pinenes adsorption isotherms on  $\gamma$ -glycine crystals at 110 °C ( $\alpha = 0.05$ ).

| <b>P, Pa</b> | <b>p</b> | <b>P, Pa</b> | <b>p</b> | <b>P, Pa</b> | <b>p</b> |
|--------------|----------|--------------|----------|--------------|----------|
| 49.25        | 0.3296   | 246.25       | 0.1966   | 1099.60      | 0.3934   |
| 98.50        | 0.2588   | 951.79       | 0.4092   | 1148.80      | 0.3751   |
| 147.75       | 0.2143   | 1001.00      | 0.3430   | 1198.10      | 0.4221   |
| 197.01       | 0.2031   | 1050.30      | 0.3450   | 1395.10      | 0.4244   |

**Table S25.** P-values for pairs of points of  $\alpha$ -pinenes adsorption isotherms on  $\gamma$ -glycine crystals at 120 °C ( $\alpha = 0.05$ ).

| <b>P, Pa</b> | <b>p</b> | <b>P, Pa</b> | <b>p</b> | <b>P, Pa</b> | <b>p</b> |
|--------------|----------|--------------|----------|--------------|----------|
| 56.45        | 0.6543   | 282.22       | 0.5995   | 507.99       | 0.9156   |
| 112.89       | 0.6263   | 338.66       | 0.7684   | 564.44       | 0.9828   |
| 169.33       | 0.6154   | 395.11       | 0.5965   | 620.88       | 0.6387   |
| 225.78       | 0.5682   | 451.55       | 0.5104   | 677.32       | 0.9980   |

**Table S26.** P-values for pairs of points of  $\alpha$ -pinenes adsorption isotherms on  $\gamma$ -glycine crystals at 130 °C ( $\alpha = 0.05$ ).

| <b>P, Pa</b> | <b>p</b> | <b>P, Pa</b> | <b>p</b> | <b>P, Pa</b> | <b>p</b> |
|--------------|----------|--------------|----------|--------------|----------|
| 64.19        | 0.2131   | 320.94       | 0.1351   | 577.70       | 0.0907   |
| 128.38       | 0.1898   | 385.13       | 0.1177   | 641.88       | 0.0593   |
| 192.57       | 0.1686   | 449.32       | 0.1034   | 834.45       | 0.0365   |
| 258.42       | 0.1509   | 513.50       | 0.0978   | 898.63       | 0.0187   |
